# Supplementary material for: Quality of force fields and sampling methods in simulating pepX peptides: a case study for intrinsically disordered proteins
Source: Royal Society of Chemistry journal article supplement (doi:10.1039/d0cp05484d), 2020-12-14
Supplement: d0cp05484d1.pdf [file d0cp05484d1.pdf]

Supporting Information for:

### Quality of Force Fields and Sampling Methods in Simulating pepX Peptides: A Case Study for Intrinsically Disordered Proteins

Anhui Wang<sup>1,2,†</sup>, Xiangda Peng<sup>2,†</sup>, Yan Li<sup>2,†</sup>, Dinglin Zhang<sup>2,3,†</sup>, Zhichao Zhang<sup>1,\*</sup>, and Guohui Li<sup>2,\*</sup>

<sup>1</sup>State Key Laboratory of Fine Chemicals, School of Chemistry, Dalian University of Technology, Dalian 116024, China

<sup>2</sup>Laboratory of Molecular Modeling and Design, State Key Laboratory of Molecular Reaction Dynamics, Dalian Institute of Chemical Physics, Chinese Academy of Sciences, Dalian 116023, China

<sup>3</sup>University of Chinese Academy of Sciences, Beijing 100049, China

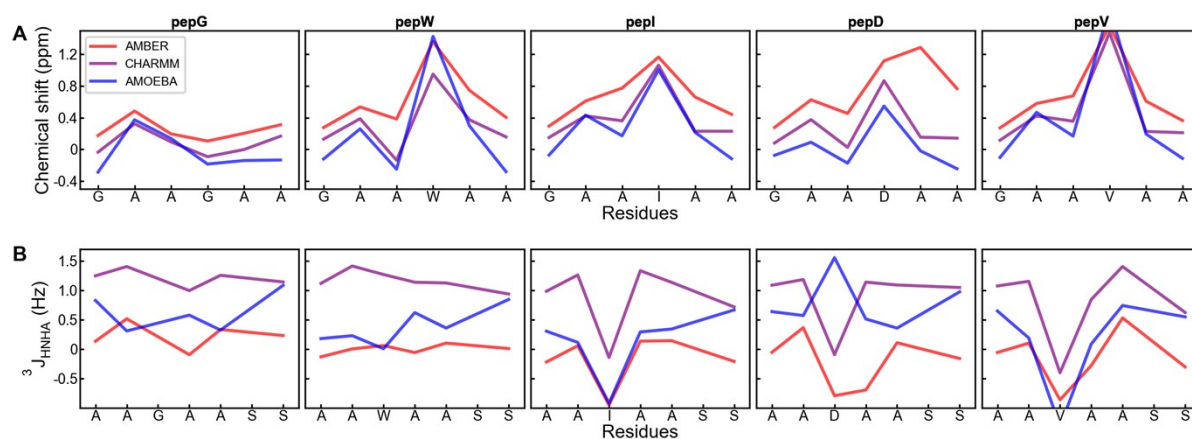

Figure S1. Residue-level differences of  $C\alpha$  chemical shifts (A) and  $^3J_{\text{HNHA}}$  couplings (B) between simulated and experimentally measured values. The first to fifth columns represent the structural measures of pepG, pepW, pepI, pepD, and pepV, respectively.

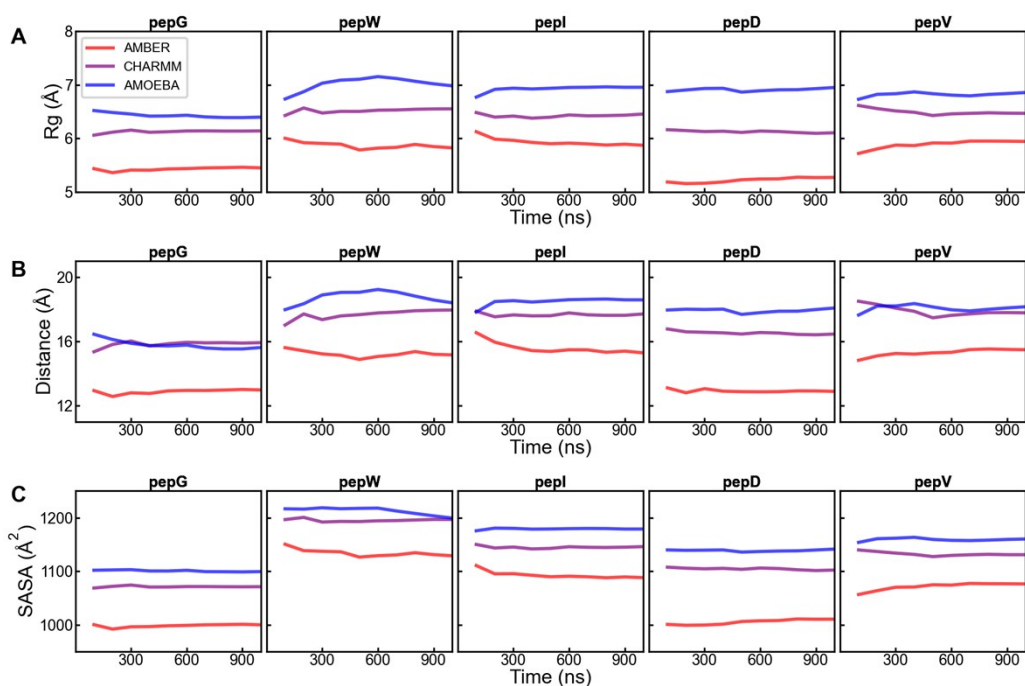

Figure S2. Reweighted running average for  $R_g$  (A), end-to-end distance (B), and SASA (C) during the IaMD simulations. The running averages were calculated and reweighted with an interval of 100 ns.

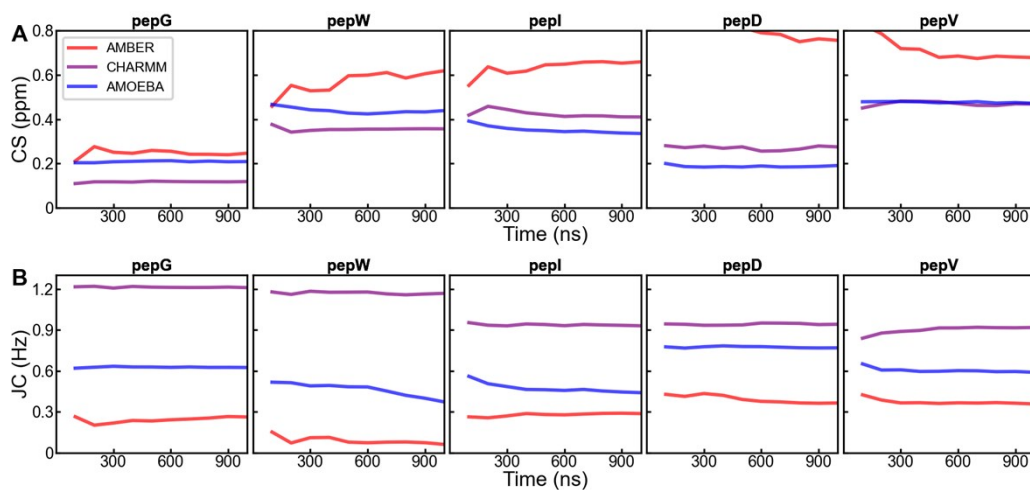

Figure S3. Reweighted running AUE for  $C\alpha$  chemical shifts (A) and  $^3J_{HNHA}$  couplings (B) during the IaMD simulations. The running AUEs were calculated and reweighted with an interval of 100 ns.

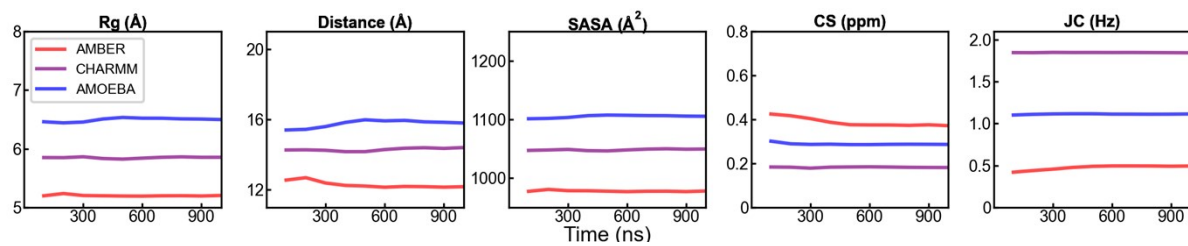

Figure S4. From left to right, the reweighted running average for  $R_g$ , end-to-end distance, SASA, reweighted running AUE for  $C\alpha$  chemical shifts, and  ${}^3J_{\text{HNHA}}$  couplings during the aMD simulations of peptide pepG. The running averages or AUEs were calculated and reweighted with an interval of 100 ns.

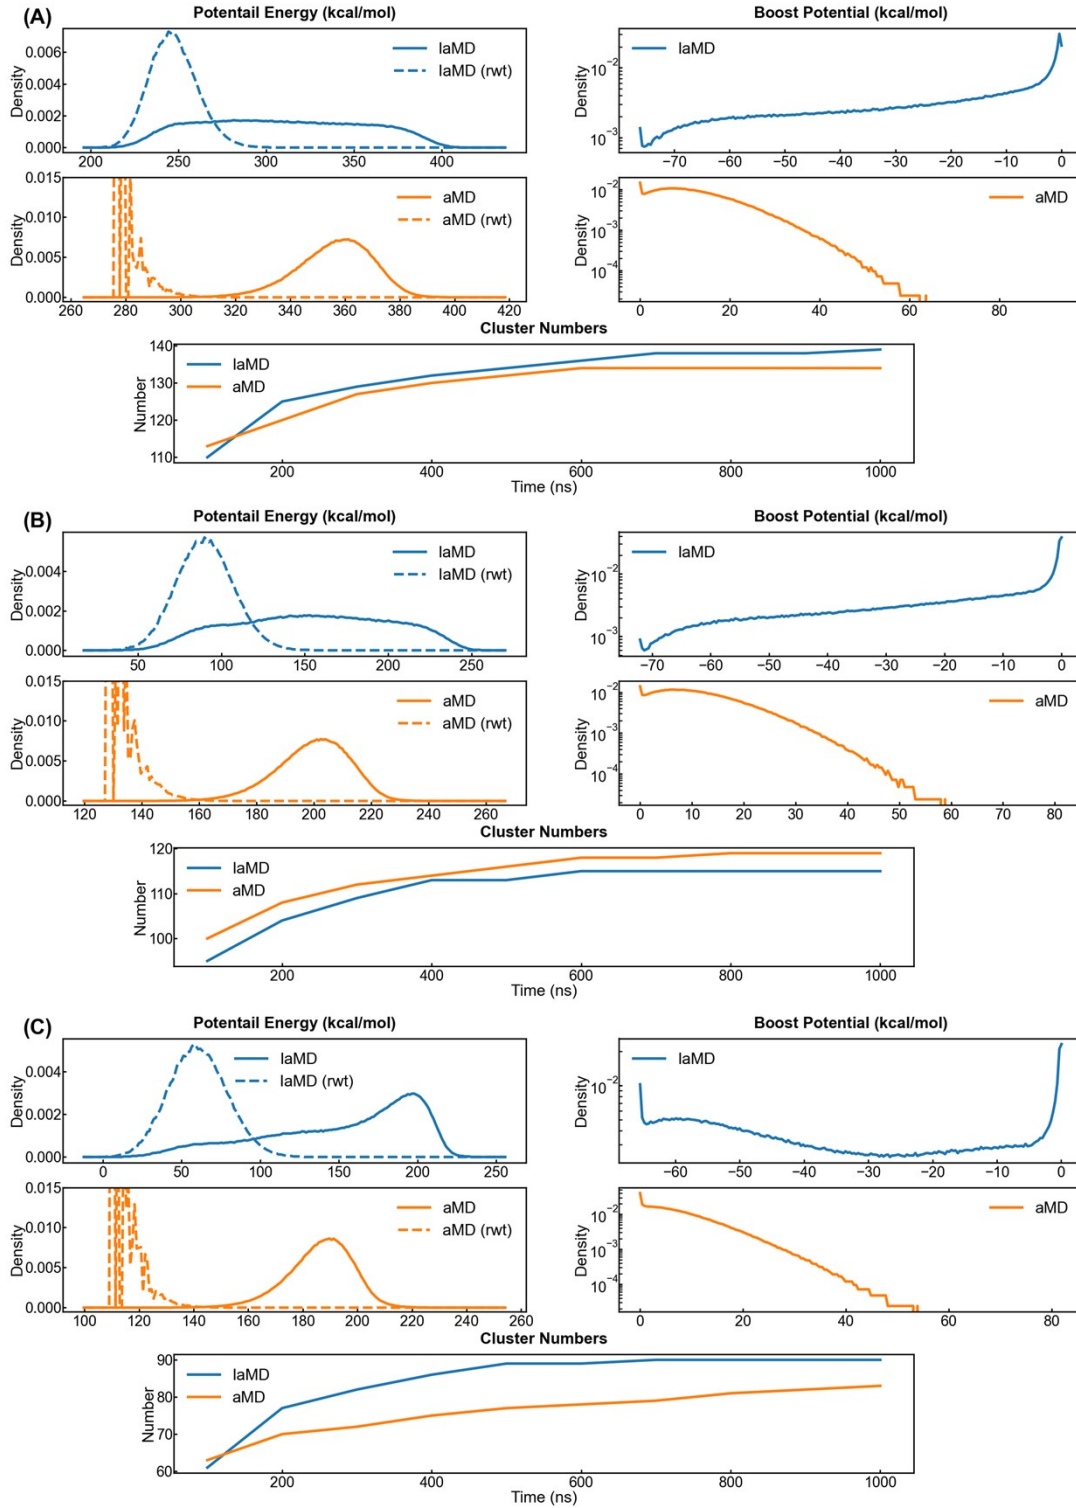

Figure S5. Distributions of torsional potential energies and boost potentials, and numbers of conformation clusters explored as a function of time for AMBER (A), CHARMM (B), and AMOEBA (C) simulations of pepG. For the distribution of torsional potential energies, the original and reweighted energies are shown in solid and dashed lines.

Table S1. Comparison of ensemble-averaged structural measures for AMBER99SB and AMBER14SB IaMD simulations.

| peptide | force field | Rg (Å) | distance (Å) | SASA (Å <sup>2</sup> ) | no. of H-bonds |       |         | secondary structure (%) |                |       |       |
|---------|-------------|--------|--------------|------------------------|----------------|-------|---------|-------------------------|----------------|-------|-------|
|         |             |        |              |                        | P-P            | P-W   | P-W/P-P | helix                   | $\beta$ -sheet | turn  | coil  |
| pepG    | 99SB        | 5.45   | 12.98        | 999.92                 | 1.75           | 28.18 | 16.12   | 5.04                    | 1.82           | 13.96 | 79.18 |
|         | 14SB        | 5.30   | 12.73        | 981.19                 | 2.04           | 27.31 | 13.38   | 9.43                    | 1.66           | 15.21 | 73.71 |
| pepW    | 99SB        | 5.82   | 15.16        | 1128.89                | 1.75           | 28.71 | 16.38   | 9.78                    | 0.38           | 12.50 | 77.35 |
|         | 14SB        | 5.31   | 14.56        | 1079.06                | 2.68           | 26.59 | 9.94    | 28.27                   | 0.14           | 10.92 | 60.67 |
| pepI    | 99SB        | 5.87   | 15.29        | 1088.02                | 1.59           | 28.53 | 18.00   | 8.02                    | 0.42           | 10.92 | 80.64 |
|         | 14SB        | 5.41   | 14.78        | 1033.72                | 2.49           | 26.55 | 10.66   | 24.21                   | 0.19           | 11.08 | 64.52 |
| pepD    | 99SB        | 5.27   | 12.89        | 1010.50                | 2.84           | 31.78 | 11.20   | 16.49                   | 0.52           | 14.60 | 68.38 |
|         | 14SB        | 5.02   | 13.64        | 974.95                 | 3.50           | 29.85 | 8.54    | 36.54                   | 0.16           | 12.8  | 50.51 |
| pepV    | 99SB        | 5.94   | 15.48        | 1076.27                | 1.52           | 28.72 | 18.94   | 6.49                    | 0.36           | 10.57 | 82.58 |
|         | 14SB        | 5.59   | 14.96        | 1037.20                | 2.15           | 27.17 | 12.64   | 17.1                    | 0.35           | 10.71 | 71.84 |
